# Supplementary material for: Genetic dissection of root traits in a rice ‘global MAGIC’ population for candidate traits to breed for reduced methane emission
Source: Front Plant Sci. 2025 Jul 9;16:1616424. doi: 10.3389/fpls.2025.1616424 (PMC12283710; doi:10.3389/fpls.2025.1616424)
Supplement: Supplementary file 2 [file Table1.xlsx]

## Sheet: Table S1
Table S1. Descriptive statistics of phenotypic values of fifteen traits in two experiments
StdDev- Standard Deviation
Traits	Range		Mean		StdDev		Sknewness		Kurtosis		Heritability
	1st Exp	2ndExp	1st Exp	2nd Exp	1st Exp	2nd Exp	1st Exp	2nd Exp	1st Exp	2nd Exp	1st Exp	2nd Exp
TN	2-15	4-15	6.0253	7.824	1.8925	1.6352	0.748	0.562	1.1363	1.0819	0.9586	0.902
RN	39-250	79-332	119.503	190.72	32.3034	44.7211	0.493	0.4333	0.528	-0.1291	0.9013	0.9168
RPT	9.75-47.33	8.833-55.8	20.9259	25.1662	6.3202	7.0248	1.0433	0.7719	1.428	0.8692	0.9663	0.919
SDW(gm)	1.13-6.49	2.69-8.48	3.5932	5.3748	0.8401	0.9191	-0.3038	0.0069	0.0421	-0.1017	0.9578	0.9261
RDW(gm)	0.18-1.88	0.37-3.11	0.7972	1.4213	0.273	0.3554	0.3631	0.2277	0.1318	0.6736	0.9419	0.889
RSRatio	0.061-0.605	0.11-0.58	0.2253	0.2654	0.0706	0.0553	0.9991	0.335	2.5079	1.2619	0.91	0.8841
RDia(mm)	0.122-0.481	0.122-0.449	0.2604	0.2536	0.0512	0.0521	0.4699	0.4237	0.1805	0.0993	0.825	0.8503
BRP(%)	11.41-53.93	10.378-53.853	36.92	37.21	6.6564	6.7877	-0.3368	-0.3505	0.1259	0.2064	0.9412	0.8746
TRP(%)	5.344-43.91	7.168-43.65	24.59	25.43	6.2355	6.1405	-0.1184	0.1873	0.1284	1.0101	0.9482	0.8141
ARP(%)	9.457-47.098	11.190-47.770	30.75	31.32	5.4596	5.2819	-0.353	-0.2396	0.6206	0.7614	0.9611	0.8966
RL(cm)	445.265-2054.341	343.421-1496.119	830.907	812.573	168.08	158.594	0.9355	0.241	4.2088	0.4319	0.757	0.6997
FLR(%)	33.764-72.452	32.247-69.579	52.3922	52.7256	6.0917	5.4145	0.0565	-0.0315	0.2173	0.3068	0.591	0.6191
TLR(%)	9.27-38.839	9.506-42.522	24.5418	24.4117	4.6513	4.2754	0.0401	0.1897	-0.0432	0.5333	0.6077	0.5994
LR(%)	64.206-87.4	64.448-86.745	76.934	77.1373	3.4706	3.4207	-0.1562	-0.4617	0.3646	0.6529	0.5267	0.5519
NR(%)	12.6-35.794	13.255-35.552	23.066	22.8627	3.4706	3.4207	0.1562	0.4617	0.3646	0.6529	0.5267	0.5519

## Sheet: Table S2
Table S2. List of MTAs identified through GWAS from both experiments associated with average root porosity
Chr - Chromosome; Pos - Position; QTN- Quantitative trait nucleotide; PVE - Phenotypic Variation Expected
Experiment	SNPid	Chr	Pos	Methods	QTN effect	PVE (%)
1	1_26187514	1	26187514	mrMLM	-1.9034	4.312
1	1_12680494	1	12680494	mrMLM	1.4354	2.7232
1	1_5945064	1	5945064	FASTmrMLM	0.7691	1.4774
1	2_21822990	2	21822990	mrMLM	2.6348	12.2735
1	2_23384518	2	23384518	mrMLM, FASTmrMLM	-1.6945	6.30145
1	2_17554823	2	17554823	mrMLM	-2.6379	2.9581
1	2_15761648	2	15761648	FASTmrMLM	-1.6206	6.3755
1	2_24686548	2	24686548	FASTmrMLM, pLARmEB	1.8392	7.1527
1	2_14499480	2	14499480	ISIS EM-BLASSO	-1.8531	3.2312
1	2_24686152	2	24686152	ISIS EM-BLASSO	1.8899	6.3011
1	3_9026803	3	9026803	mrMLM	-1.2335	3.1235
1	3_14056470	3	14056470	FASTmrMLM	1.7048	4.8853
1	3_19625582	3	19625582	FASTmrMLM	-0.8823	1.1277
1	3_25388588	3	25388588	FASTmrMLM, pLARmEB, ISIS EM-BLASSO	2.89105	4.2036
1	3_20106775	3	20106775	pLARmEB, ISIS EM-BLASSO	-2.2199	3.99545
1	3_13408609	3	13408609	ISIS EM-BLASSO	-1.762	8.9035
1	3_19295959	3	19295959	ISIS EM-BLASSO	1.3805	4.8864
1	4_19778598	4	19778598	mrMLM	2.6158	5.9338
1	4_14608728	4	14608728	FASTmrMLM	-2.2609	12.5921
1	4_35286065	4	35286065	FASTmrMLM, pLARmEB, ISIS EM-BLASSO	1.71605	3.739
1	4_5494898	4	5494898	ISIS EM-BLASSO	-1.3512	4.9355
1	5_14539819	5	14539819	mrMLM	2.7262	5.7301
1	6_13504504	6	13504504	mrMLM	-2.1999	10.3236
1	6_9150096	6	9150096	mrMLM	-1.715	4.8182
1	6_656778	6	656778	pLARmEB	1.4115	4.4787
1	6_16085163	6	16085163	pLARmEB	1.1558	2.6294
1	7_2094450	7	2094450	FASTmrMLM	-0.9314	2.1726
1	7_2281673	7	2281673	pLARmEB	-1.5796	2.9902
1	7_5347116	7	5347116	pLARmEB	-1.2003	1.0721
1	7_10538859	7	10538859	pLARmEB	-1.6051	5.7236
1	7_27887013	7	27887013	ISIS EM-BLASSO	0.841	1.6852
1	8_6566366	8	6566366	mrMLM	-1.9957	7.9407
1	8_8726168	8	8726168	FASTmrMLM	1.2115	3.6241
1	8_15637031	8	15637031	ISIS EM-BLASSO	1.8985	4.0198
1	9_6323564	9	6323564	mrMLM	2.5439	3.6762
1	9_15017640	9	15017640	ISIS EM-BLASSO	1.0413	2.1559
1	10_5632488	10	5632488	mrMLM	2.0569	0.3417
1	10_8792553	10	8792553	mrMLM	-1.4957	3.8766
1	10_9009414	10	9009414	FASTmrMLM	1.1793	3.4174
1	10_12828323	10	12828323	FASTmrMLM	1.717	5.0351
1	10_7105285	10	7105285	ISIS EM-BLASSO	-1.5407	6.7803
1	11_19762048	11	19762048	mrMLM	-3.5812	5.4519
1	11_28806840	11	28806840	FASTmrMLM	2.0504	7.0669
1	11_18243821	11	18243821	pLARmEB, ISIS EM-BLASSO	1.7947	4.88305
1	11_2807810	11	2807810	ISIS EM-BLASSO	0.7756	1.7268
1	11_18717506	11	18717506	ISIS EM-BLASSO	-1.6752	3.0097
1	12_13064078	12	13064078	pLARmEB	1.1989	3.0578
1	12_25145065	12	25145065	ISIS EM-BLASSO	-1.012	2.8683
2	1_10211601	1	10211601	mrMLM, FASTmrMLM	-1.36055	5.2226
2	2_24686356	2	24686356	mrMLM, FASTmrMLM, pLARmEB	1.67345	7.75845
2	2_6201455	2	6201455	mrMLM	1.2644	3.0154
2	2_14105689	2	14105689	mrMLM	-2.3114	4.9272
2	2_15761648	2	15761648	FASTmrMLM, ISIS EM-BLASSO	-1.27565	5.37285
2	2_8376459	2	8376459	ISIS EM-BLASSO	0.8715	2.4695
2	3_19625582	3	19625582	mrMLM, FASTmrMLM	-1.14025	2.38855
2	3_19295959	3	19295959	mrMLM	1.9653	8.8737
2	3_14056470	3	14056470	FASTmrMLM	1.6536	6.1382
2	3_20106775	3	20106775	FASTmrMLM, pLARmEB, ISIS EM-BLASSO	-2.36325	6.3245
2	3_20760830	3	20760830	FASTmrMLM, pLARmEB, ISIS EM-BLASSO	1.3429	6.0449
2	3_25388588	3	25388588	FASTmrMLM, ISIS EM-BLASSO	2.05465	2.9367
2	3_20087664	3	20087664	ISIS EM-BLASSO	-0.8464	1.7729
2	4_3868089	4	3868089	mrMLM, ISIS EM-BLASSO	-0.8637	2.13855
2	4_23389230	4	23389230	mrMLM	1.4609	5.2834
2	4_3741980	4	3741980	pLARmEB	1.667	4.516
2	4_35286065	4	35286065	pLARmEB	1.081	2.0123
2	4_16866019	4	16866019	ISIS EM-BLASSO	-1.1264	0.5649
2	5_29911015	5	29911015	FASTmrMLM, ISIS EM-BLASSO	0.9741	2.9336
2	6_3134005	6	3134005	FASTmrMLM, pLARmEB, ISIS EM-BLASSO	1.46475	5.3033
2	6_9150096	6	9150096	FASTmrMLM, pLARmEB, ISIS EM-BLASSO	-1.3781	5.17
2	6_13854179	6	13854179	FASTmrMLM	-0.7443	0.2048
2	6_665485	6	665485	pLARmEB, ISIS EM-BLASSO	1.07565	4.0733
2	7_10538859	7	10538859	mrMLM	-1.2308	3.8129
2	7_2094450	7	2094450	FASTmrMLM	-0.4153	0.5769
2	7_3177701	7	3177701	FASTmrEMMA	-3.6711	3.2245
2	7_26746541	7	26746541	FASTmrEMMA	3.0061	3.8118
2	7_516953	7	516953	pLARmEB	-0.859	2.0078
2	7_19324604	7	19324604	ISIS EM-BLASSO	1.1566	3.2633
2	8_15802228	8	15802228	FASTmrMLM, ISIS EM-BLASSO	-1.66575	6.19455
2	8_7273259	8	7273259	ISIS EM-BLASSO	-1.5689	6.5848
2	9_17241676	9	17241676	mrMLM, FASTmrMLM, pLARmEB	1.2962	2.122
2	9_6443135	9	6443135	FASTmrMLM	1.0029	0.4316
2	10_7105285	10	7105285	mrMLM, FASTmrMLM, pLARmEB, ISIS EM-BLASSO	-2.053	12.5526
2	10_7312086	10	7312086	FASTmrMLM	-0.7571	1.675
2	10_11883271	10	11883271	FASTmrEMMA	1.9912	4.2197
2	11_14310946	11	14310946	mrMLM, FASTmrMLM	2.1463	7.722
2	11_13008985	11	13008985	mrMLM, FASTmrMLM, pLARmEB	1.44195	5.85495
2	11_957687	11	957687	pLARmEB	0.7422	1.2838
2	11_18717506	11	18717506	ISIS EM-BLASSO	-1.3612	2.402
2	12_12920352	12	12920352	pLARmEB	0.7187	1.7403

## Sheet: Table S3
Table S3. List of genes identified as associated with average root porosity
Chr - Chromosome; Pos - Position
Experiment	gene_id	Start	Stop	Strand	Function
1	LOC_Os01g36294	20124194	20126856	+	cytochrome 20P450 2C 20putative 2C 20expressed
1	LOC_Os01g39740	22408357	22411409	-	retrotransposon 20protein 2C 20putative 2C 20unclassified 2C 20expressed
1	LOC_Os02g38680	23378055	23384640	+	EMB2423 2C 20putative 2C 20expressed
1	LOC_Os03g35390	19621265	19627177	-	retrotransposon 20protein 2C 20putative 2C 20unclassified 2C 20expressed
1	LOC_Os03g44970	25388427	25388783	+	hypothetical 20protein
1	LOC_Os03g36239	20096461	20109013	-	retrotransposon 20protein 2C 20putative 2C 20Ty3-gypsy 20subclass 2C 20expressed
1	LOC_Os03g23200	13405258	13413148	-	retrotransposon 20protein 2C 20putative 2C 20Ty3-gypsy 20subclass 2C 20expressed
1	LOC_Os03g33750	19293763	19296489	+	retrotransposon 20protein 2C 20putative 2C 20LINE 20subclass 2C 20expressed
1	LOC_Os04g59360	35283206	35286176	+	csAtPR5 2C 20putative 2C 20expressed
1	LOC_Os05g34010	20086679	20091534	-	peptide 20transporter 20PTR2 2C 20putative 2C 20expressed
1	LOC_Os06g16070	9146959	9150341	-	receptor-like 20protein 20kinase 202 20precursor 2C 20putative 2C 20expressed
1	LOC_Os06g02160	647033	656850	+	AMP-binding 20enzyme 20family 20protein 2C 20expressed
1	LOC_Os06g28310	16076345	16085869	+	retrotransposon 20protein 2C 20putative 2C 20unclassified 2C 20expressed
1	LOC_Os07g02630	950862	953907	-	expressed 20protein
1	LOC_Os07g10020	5346830	5348412	+	retrotransposon 20protein 2C 20putative 2C 20unclassified 2C 20expressed
1	LOC_Os07g17810	10537527	10540148	-	retrotransposon 20protein 2C 20putative 2C 20Ty3-gypsy 20subclass 2C 20expressed
1	LOC_Os07g33660	20113509	20115204	+	expressed 20protein
1	LOC_Os08g11170	6564877	6566557	+	retrotransposon 20protein 2C 20putative 2C 20unclassified
1	LOC_Os08g14520	8725759	8726825	+	retrotransposon 2C 20putative 2C 20centromere-specific
1	LOC_Os09g11370	6323254	6323796	+	expressed 20protein
1	LOC_Os10g10244	5632247	5643116	+	alanyl-tRNA 20synthetase 2C 20putative 2C 20expressed
1	LOC_Os10g17454	8786948	8796519	-	RNA 20recognition 20motif 20containing 20protein 2C 20expressed
1	LOC_Os10g17810	9008482	9011392	-	hypothetical 20protein
1	LOC_Os10g24920	12828017	12832364	-	retrotransposon 20protein 2C 20putative 2C 20unclassified 2C 20expressed
1	LOC_Os10g12740	7103112	7108165	-	retrotransposon 20protein 2C 20putative 2C 20unclassified 2C 20expressed
1	LOC_Os11g33394	19756548	19763118	+	plant 20protein 20of 20unknown 20function 20domain 20containing 20protein 2C 20expressed
1	LOC_Os11g47760	28804248	28808550	+	DnaK 20family 20protein 2C 20putative 2C 20expressed
1	LOC_Os11g05950	2807608	2808358	-	expressed 20protein
1	LOC_Os12g23100	13060513	13064998	+	retrotransposon 20protein 2C 20putative 2C 20unclassified 2C 20expressed
1	LOC_Os12g40630	25142777	25148196	+	helix-loop-helix 20DNA-binding 20domain 20containing 20protein 2C 20expressed
2	LOC_Os01g39740	22408357	22411409	-	retrotransposon 20protein 2C 20putative 2C 20unclassified 2C 20expressed
2	LOC_Os02g11960	6197353	6204374	+	ABC 20transporter 2C 20ATP-binding 20protein 2C 20putative 2C 20expressed
2	LOC_Os02g24310	14103970	14105964	-	transposon 20protein 2C 20putative 2C 20CACTA 2C 20En 2FSpm 20sub-class 2C 20expressed
2	LOC_Os03g35390	19621265	19627177	-	retrotransposon 20protein 2C 20putative 2C 20unclassified 2C 20expressed
2	LOC_Os03g33750	19293763	19296489	+	retrotransposon 20protein 2C 20putative 2C 20LINE 20subclass 2C 20expressed
2	LOC_Os03g36239	20096461	20109013	-	retrotransposon 20protein 2C 20putative 2C 20Ty3-gypsy 20subclass 2C 20expressed
2	LOC_Os04g33280	20124599	20131224	-	expressed 20protein
2	LOC_Os04g33280	20124599	20131224	-	hypothetical 20protein
2	LOC_Os04g07280	3865931	3869271	+	AGAP002737-PA 2C 20putative 2C 20expressed
2	LOC_Os04g39300	23388563	23389490	-	heavy 20metal 20transport 2Fdetoxification 20protein 2C 20putative 2C 20expressed
2	LOC_Os04g07000	3741495	3743579	+	retrotransposon 20protein 2C 20putative 2C 20unclassified 2C 20expressed
2	LOC_Os04g59360	35283206	35286176	+	csAtPR5 2C 20putative 2C 20expressed
2	LOC_Os04g28480	16863758	16870091	-	retrotransposon 20protein 2C 20putative 2C 20unclassified 2C 20expressed
2	LOC_Os06g06670	3131221	3134226	+	expressed 20protein
2	LOC_Os06g16070	9146959	9150341	-	receptor-like 20protein 20kinase 202 20precursor 2C 20putative 2C 20expressed
2	LOC_Os07g17810	10537527	10540148	-	retrotransposon 20protein 2C 20putative 2C 20Ty3-gypsy 20subclass 2C 20expressed
2	LOC_Os07g02630	950862	953907	-	expressed 20protein
2	LOC_Os07g01860	515825	521967	+	expressed 20protein
2	LOC_Os08g25970	15800600	15806825	+	retrotransposon 20protein 2C 20putative 2C 20unclassified 2C 20expressed
2	LOC_Os09g28370	17231298	17243999	-	retrotransposon 20protein 2C 20putative 2C 20unclassified 2C 20expressed
2	LOC_Os09g11530	6442329	6443669	-	expressed 20protein
2	LOC_Os10g12740	7103112	7108165	-	retrotransposon 20protein 2C 20putative 2C 20unclassified 2C 20expressed
2	LOC_Os10g22869	11878644	11885484	-	expressed 20protein
2	LOC_Os11g25120	14309794	14311394	-	transposon 20protein 2C 20putative 2C 20unclassified
2	LOC_Os11g22620	13006602	13011077	-	retrotransposon 20protein 2C 20putative 2C 20LINE 20subclass 2C 20expressed

## Sheet: Table S4
Table S4. List of MTAs identified through GWAS from both experiments associated with base root porosity
Chr - Chromosome; Pos - Position; QTN- Quantitative trait nucleotide; PVE - Phenotypic Variation Expected
Experiment	SNPid	Chr	Pos	Methods	QTN effect	PVE (%)
1	1_31811025	1	31811025	mrMLM	2.1896	3.5534
1	1_10095764	1	10095764	FASTmrMLM	-0.9802	1.8933
1	1_2683653	1	2683653	FASTmrEMMA	4.084	3.9765
1	2_20202324	2	20202324	mrMLM	-1.3061	2.8734
1	2_28929213	2	28929213	mrMLM, pLARmEB	1.2179	1.7762
1	2_24686152	2	24686152	FASTmrMLM, pLARmEB, ISIS EM-BLASSO	2.2362	4.8313
1	2_17554823	2	17554823	pLARmEB, ISIS EM-BLASSO	-3.0485	2.2389
1	2_23384518	2	23384518	ISIS EM-BLASSO	-1.5968	5.6184
1	3_20760830	3	20760830	mrMLM	1.8473	5.782
1	3_19295959	3	19295959	mrMLM, FASTmrMLM, pLARmEB	1.4487	2.9467
1	3_19625582	3	19625582	FASTmrMLM, pLARmEB, ISIS EM-BLASSO	-1.8876	2.1718
1	3_8992734	3	8992734	pLARmEB	-1.5985	2.9054
1	3_8700835	3	8700835	ISIS EM-BLASSO	-1.9079	8.2806
1	4_24927542	4	24927542	mrMLM	2.5493	5.9888
1	4_29687885	4	29687885	pLARmEB	0.8523	0.5877
1	4_35286065	4	35286065	ISIS EM-BLASSO	1.5046	2.611
1	5_29911015	5	29911015	mrMLM	1.9051	6.0382
1	5_7865640	5	7865640	mrMLM, ISIS EM-BLASSO	0.9586	1.4101
1	5_26489463	5	26489463	FASTmrMLM	1.8055	4.01
1	5_1472493	5	1472493	FASTmrEMMA	3.6016	6.9119
1	5_1522529	5	1522529	pLARmEB	0.9312	1.2088
1	5_29791341	5	29791341	pLARmEB, ISIS EM-BLASSO	-1.8405	0.9987
1	6_23071833	6	23071833	mrMLM	2.111	0.9052
1	6_5892119	6	5892119	FASTmrMLM, pLARmEB	-1.7751	2.6206
1	6_16085163	6	16085163	FASTmrMLM, pLARmEB	1.3785	2.6725
1	6_5276459	6	5276459		1.8299	2.7781
1	6_30800998	6	30800998	pLARmEB	1.142	2.0502
1	6_9150115	6	9150115	ISIS EM-BLASSO	-1.2767	3.105
1	6_21663985	6	21663985	ISIS EM-BLASSO	1.3572	3.5448
1	6_29597165	6	29597165	ISIS EM-BLASSO	1.0791	2.7259
1	7_28416595	7	28416595	mrMLM	2.0068	7.3422
1	7_27883323	7	27883323	mrMLM	1.3836	3.2249
1	7_1133976	7	1133976	mrMLM	-1.6529	5.0188
1	7_4465657	7	4465657	mrMLM	-1.5594	3.3628
1	7_2044381	7	2044381	FASTmrMLM	-0.7899	1.2971
1	7_8806137	7	8806137	FASTmrMLM	1.1814	2.8077
1	7_29558698	7	29558698	FASTmrMLM, pLARmEB, ISIS EM-BLASSO	1.4561	4.3101
1	8_20251053	8	20251053	mrMLM	1.9886	6.301
1	8_8052149	8	8052149	pLARmEB	-1.0165	1.6084
1	8_20104234	8	20104234	ISIS EM-BLASSO	-1.1325	1.7162
1	9_17241676	9	17241676	mrMLM, FASTmrMLM, pLARmEB	1.5509	1.6342
1	10_580277	10	580277	FASTmrMLM, pLARmEB	-1.1275	1.2861
1	10_7105285	10	7105285	FASTmrMLM, pLARmEB, ISIS EM-BLASSO	-1.9425	3.0246
1	10_9027576	10	9027576	FASTmrEMMA, ISIS EM-BLASSO	-4.7939	0.3415
1	10_7435362	10	7435362	pLARmEB	1.2255	1.5587
1	11_18243944	11	18243944	mrMLM, FASTmrMLM	2.8949	10.7859
1	11_18717506	11	18717506	FASTmrMLM	-1.5678	1.9124
1	11_18243821	11	18243821	pLARmEB, ISIS EM-BLASSO	1.8614	4.7383
1	12_11583556	12	11583556	mrMLM, FASTmrMLM, FASTmrEMMA, pLARmEB	-2.655	1.0692
1	12_15059366	12	15059366	pLARmEB	1.0245	1.561
2	1_6109074	1	6109074	FASTmrMLM	-0.8312	1.3301
2	1_25731071	1	25731071	FASTmrMLM, pLARmEB	1.8628	3.21865
2	1_31915301	1	31915301	FASTmrMLM, pLARmEB	1.3418	1.56155
2	1_36022414	1	36022414	FASTmrMLM	1.0122	2.4499
2	1_2683653	1	2683653	FASTmrEMMA, ISIS EM-BLASSO	2.1847	2.07925
2	1_26187514	1	26187514	ISIS EM-BLASSO	-1.3015	2.4932
2	2_17554823	2	17554823	mrMLM, FASTmrMLM, pLARmEB	-2.32575	1.8818
2	2_895289	2	895289	mrMLM, FASTmrMLM, pLARmEB	1.49675	2.8467
2	2_24835612	2	24835612	mrMLM	1.4731	4.5525
2	2_24686152	2	24686152	FASTmrMLM, pLARmEB	1.9024	4.16155
2	2_1175942	2	1175942	pLARmEB	-0.5246	0.2293
2	3_19295959	3	19295959	mrMLM, FASTmrMLM, pLARmEB, ISIS EM-BLASSO	1.8988	5.6967
2	3_19625582	3	19625582	mrMLM, FASTmrMLM, pLARmEB, ISIS EM-BLASSO	-1.765	3.9085
2	3_248540	3	248540	pLARmEB	0.8915	0.7071
2	3_25538170	3	25538170	ISIS EM-BLASSO	-1.3441	4.0968
2	3_33946991	3	33946991	ISIS EM-BLASSO	1.3054	4.495
2	5_29911015	5	29911015	mrMLM, FASTmrMLM, pLARmEB, ISIS EM-BLASSO	1.45325	4.4931
2	5_1968709	5	1968709	mrMLM	1.6465	1.6003
2	5_1472493	5	1472493	FASTmrMLM, pLARmEB	1.17105	2.67165
2	5_1522529	5	1522529	ISIS EM-BLASSO	1.0369	2.5355
2	5_7865640	5	7865640	ISIS EM-BLASSO	0.8339	1.2003
2	6_20501858	6	20501858	mrMLM	-1.8881	7.1344
2	6_4140943	6	4140943	ISIS EM-BLASSO	-2.3269	6.8285
2	6_13853652	6	13853652	ISIS EM-BLASSO	-1.5178	2.6477
2	6_14604793	6	14604793	ISIS EM-BLASSO	2.3872	9.6653
2	6_29585252	6	29585252	ISIS EM-BLASSO	1.0058	1.8056
2	7_29558698	7	29558698	mrMLM, pLARmEB	1.17135	2.1833
2	7_2044381	7	2044381	mrMLM	-1.113	2.6036
2	7_28416595	7	28416595	FASTmrMLM, pLARmEB	1.27725	3.51185
2	8_2173552	8	2173552	FASTmrMLM, pLARmEB	-1.35035	1.9682
2	8_7273259	8	7273259	FASTmrMLM, pLARmEB	-1.6295	3.16025
2	9_17241676	9	17241676	mrMLM, pLARmEB	1.42375	1.70065
2	9_6443135	9	6443135	FASTmrMLM	0.9051	0.2656
2	9_21569130	9	21569130	pLARmEB	1.1389	1.0479
2	9_6102590	9	6102590	ISIS EM-BLASSO	2.1669	4.2859
2	10_7105285	10	7105285	mrMLM, FASTmrMLM, pLARmEB, ISIS EM-BLASSO	-1.42955	3.9693
2	10_580277	10	580277	mrMLM	-1.2466	3.1235
2	10_3538372	10	3538372	mrMLM	-1.5399	1.2374
2	10_8903154	10	8903154	pLARmEB	0.7549	0.5069
2	10_8770876	10	8770876	ISIS EM-BLASSO	1.374	2.1697
2	10_9027576	10	9027576	ISIS EM-BLASSO	-1.3345	0.2655
2	11_18243944	11	18243944	mrMLM	2.2804	7.4676
2	11_14310946	11	14310946	mrMLM	2.0201	4.8641
2	11_18717506	11	18717506	mrMLM	-2.1897	3.7719
2	11_4169793	11	4169793	FASTmrMLM	-1.0685	2.8855
2	11_13008985	11	13008985	FASTmrMLM, pLARmEB	0.9535	1.48925
2	11_13305325	11	13305325	FASTmrMLM, pLARmEB	-1.28875	2.2028
2	11_18243821	11	18243821	ISIS EM-BLASSO	1.9274	5.7148
2	12_11583556	12	11583556	mrMLM	-1.142	2.7016
2	12_11850522	12	11850522	mrMLM, FASTmrMLM, pLARmEB, ISIS EM-BLASSO	1.64205	6.46715

## Sheet: Table S5
Table S5. List of candidate genes identifed associated with base root porosity
Chr - Chromosome; Pos - Position
Experiment	Chr	gene_id	start	stop	strand	Function
1	1	LOC_Os01g55260	31806962	31811865	+	AAA-type 20ATPase 20family 20protein 2C 20putative 2C 20expressed
1	1	LOC_Os01g18040	10090866	10097284	-	retrotransposon 20protein 2C 20putative 2C 20unclassified 2C 20expressed
1	1	LOC_Os01g39740	22408357	22411409	-	retrotransposon 20protein 2C 20putative 2C 20unclassified 2C 20expressed
1	2	LOC_Os02g47390	28928706	28932010	-	expressed 20protein
1	2	LOC_Os02g38680	23378055	23384640	+	EMB2423 2C 20putative 2C 20expressed
1	3	LOC_Os03g37440	20760788	20761707	-	retrotransposon 20protein 2C 20putative 2C 20unclassified
1	3	LOC_Os03g33750	19293763	19296489	+	retrotransposon 20protein 2C 20putative 2C 20LINE 20subclass 2C 20expressed
1	3	LOC_Os03g35390	19621265	19627177	-	retrotransposon 20protein 2C 20putative 2C 20unclassified 2C 20expressed
1	3	LOC_Os03g15770	8698047	8702758	+	tyrosine 20protein 20kinase 20domain 20containing 20protein 2C 20putative 2C 20expressed
1	4	LOC_Os04g49790	29682474	29687968	-	retrotransposon 20protein 2C 20putative 2C 20Ty1-copia 20subclass 2C 20expressed
1	4	LOC_Os04g59360	35283206	35286176	+	csAtPR5 2C 20putative 2C 20expressed
1	5	LOC_Os05g14080	7864272	7865740	+	expressed 20protein
1	5	LOC_Os05g34040	20102713	20112210	-	monooxygenase 2C 20putative 2C 20expressed
1	5	LOC_Os05g03480	1470034	1474084	-	acyl-coenzyme 20A 20dehydrogenase 2C 20mitochondrial 20precursor 2C 20putative 2C 20expressed
1	5	LOC_Os05g03590	1521685	1522928	-	expressed 20protein
1	5	LOC_Os05g51910	29787386	29791926	-	retrotransposon 20protein 2C 20putative 2C 20unclassified 2C 20expressed
1	6	LOC_Os06g11220	5891071	5892183	-	retrotransposon 20protein 2C 20putative 2C 20unclassified
1	6	LOC_Os06g28310	16076345	16085869	+	retrotransposon 20protein 2C 20putative 2C 20unclassified 2C 20expressed
1	6	LOC_Os06g50910	30797112	30815783	-	Phosphatidylinositol 20kinase 20and 20FAT 20containing 20domain 20protein 2C 20putative 2C 20expressed
1	6	LOC_Os06g16070	9146959	9150341	-	receptor-like 20protein 20kinase 202 20precursor 2C 20putative 2C 20expressed
1	6	LOC_Os06g48880	29596074	29598295	-	expressed 20protein
1	7	LOC_Os07g02630	950862	953907	-	expressed 20protein
1	8	LOC_Os08g32690	20248647	20254581	-	expressed 20protein
1	8	LOC_Os08g13540	8049365	8052181	+	retrotransposon 20protein 2C 20putative 2C 20Ty3-gypsy 20subclass 2C 20expressed
1	9	LOC_Os09g34110	20128154	20134451	-	expressed 20protein
1	10	LOC_Os10g02080	680099	683327	-	PTR-like 20peptide 20transporter 2C 20putatuve 2C 20expressed
1	10	LOC_Os10g12740	7103112	7108165	-	retrotransposon 20protein 2C 20putative 2C 20unclassified 2C 20expressed
1	10	LOC_Os10g13694	7435092	7442015	+	expressed 20protein
1	12	LOC_Os12g01790	478528	482911	+	retrotransposon 20protein 2C 20putative 2C 20unclassified 2C 20expressed
2	1	LOC_Os01g11360	6108958	6111317	-	expressed 20protein
2	1	LOC_Os01g45330	25727086	25734913	-	retrotransposon 20protein 2C 20putative 2C 20Ty3-gypsy 20subclass 2C 20expressed
2	1	LOC_Os01g62244	36017204	36023469	-	ubiquitin-conjugating 20enzyme 2C 20putative 2C 20expressed
2	1	LOC_Os01g39740	22408357	22411409	-	retrotransposon 20protein 2C 20putative 2C 20unclassified 2C 20expressed
2	1	LOC_Os01g46060	26183883	26190195	+	NUC189 20domain 20containing 20protein 2C 20expressed
2	2	LOC_Os02g02510	894656	895733	-	DNA-directed 20RNA 20polymerase 20II 20subunit 20RPB4 2C 20putative 2C 20expressed
2	2	LOC_Os02g02990	1174224	1176785	-	translation 20initiation 20factor 20eIF3 20subunit 2C 20putative 2C 20expressed
2	3	LOC_Os03g33750	19293763	19296489	+	retrotransposon 20protein 2C 20putative 2C 20LINE 20subclass 2C 20expressed
2	3	LOC_Os03g35390	19621265	19627177	-	retrotransposon 20protein 2C 20putative 2C 20unclassified 2C 20expressed
2	5	LOC_Os05g04330	1965596	1974888	+	DNA 20methyltransferase 20protein 2C 20putative 2C 20expressed
2	5	LOC_Os05g03480	1470034	1474084	-	acyl-coenzyme 20A 20dehydrogenase 2C 20mitochondrial 20precursor 2C 20putative 2C 20expressed
2	5	LOC_Os05g03590	1521685	1522928	-	expressed 20protein
2	5	LOC_Os05g14080	7864272	7865740	+	expressed 20protein
2	6	LOC_Os06g08440	4137248	4142663	+	two-component 20response 20regulator 2C 20putative 2C 20expressed
2	6	LOC_Os06g24910	14602718	14605945	-	expressed 20protein
2	7	LOC_Os07g02630	950862	953907	-	expressed 20protein
2	8	LOC_Os08g04440	2173391	2177071	-	RNA 20recognition 20motif 20containing 20protein 2C 20putative 2C 20expressed
2	9	LOC_Os09g11530	6442329	6443669	-	expressed 20protein
2	9	LOC_Os09g37344	21568288	21570887	+	expressed 20protein
2	9	LOC_Os09g11010	6100888	6104613	+	retrotransposon 20protein 2C 20putative 2C 20unclassified 2C 20expressed
2	10	LOC_Os10g12740	7103112	7108165	-	retrotransposon 20protein 2C 20putative 2C 20unclassified 2C 20expressed
2	10	LOC_Os10g02080	680099	683327	-	PTR-like 20peptide 20transporter 2C 20putatuve 2C 20expressed
2	10	LOC_Os10g06800	3537913	3538890	+	cyclin-dependent 20kinase 20G-2 2C 20putative 2C 20expressed
2	10	LOC_Os10g17620	8902954	8905646	-	retrotransposon 20protein 2C 20putative 2C 20unclassified 2C 20expressed
2	10	LOC_Os10g17400	8768617	8773877	-	retrotransposon 2C 20putative 2C 20centromere-specific 2C 20expressed
2	11	LOC_Os11g25120	14309794	14311394	-	transposon 20protein 2C 20putative 2C 20unclassified
2	11	LOC_Os11g08020	4168186	4175166	-	ankyrin 20repeat 20family 20protein 2C 20putative 2C 20expressed
2	11	LOC_Os11g22620	13006602	13011077	-	retrotransposon 20protein 2C 20putative 2C 20LINE 20subclass 2C 20expressed
2	12	LOC_Os12g01790	478528	482911	+	retrotransposon 20protein 2C 20putative 2C 20unclassified 2C 20expressed

## Sheet: Table S6
Table S6. List of MTAs identified through GWAS from both experiments associated with root diameter
Chr - Chromosome; Pos - Position; QTN- Quantitative trait nucleotide; PVE - Phenotypic Variation Expected
Experiment	SNPid	Chr	Position	Methods	QTN effect	PVE (%)
1	1_43067699	1	43067699	mrMLM	-0.01	1.32
1	1_4812327	1	4812327	pLARmEB	-0.01	0.74
1	1_6161618	1	6161618	pLARmEB	0	0.96
1	1_26191728	1	26191728	ISIS EM-BLASSO	-0.01	4.62
1	2_11731107	2	11731107	mrMLM	0.01	4.76
1	2_5396097	2	5396097	FASTmrMLM, pLARmEB	0.01	4.65
1	2_11628436	2	11628436	FASTmrMLM, pLARmEB	-0.01	2.65
1	2_13816120	2	13816120	pLARmEB	0.01	1.94
1	3_18260674	3	18260674	mrMLM	0.01	10.2
1	3_14413950	3	14413950	mrMLM, pLARmEB	-0.01	1.75
1	3_27087884	3	27087884	mrMLM	0.01	3.09
1	3_3499078	3	3499078	FASTmrMLM, pLARmEB, ISIS EM-BLASSO	0.01	2.4
1	3_20105573	3	20105573	FASTmrMLM	0.01	8.56
1	3_21546493	3	21546493	FASTmrMLM	-0.02	6.99
1	3_35504520	3	35504520	FASTmrEMMA	0.03	4.34
1	4_35296119	4	35296119	FASTmrMLM	-0.01	1.99
1	4_35173290	4	35173290	pLARmEB	0	1.71
1	4_35296090	4	35296090	pLARmEB, ISIS EM-BLASSO	-0.01	1.99
1	4_30619775	4	30619775	ISIS EM-BLASSO	-0.01	1.35
1	5_1039308	5	1039308	mrMLM, FASTmrMLM, FASTmrEMMA, pLARmEB, ISIS EM-BLASSO	0.01	2.41
1	5_18499297	5	18499297	FASTmrMLM	0.01	4.13
1	5_28003698	5	28003698	FASTmrMLM, pLARmEB, ISIS EM-BLASSO	0.01	5.49
1	5_6253973	5	6253973	pLARmEB	0.01	5.34
1	5_9718550	5	9718550	pLARmEB	-0.01	2.36
1	6_15086302	6	15086302	mrMLM	-0.01	4.07
1	6_27147800	6	27147800	mrMLM	-0.01	3.36
1	6_16085163	6	16085163	mrMLM	0.01	3.75
1	6_10197477	6	10197477	pLARmEB	0.01	2.05
1	6_21663985	6	21663985	pLARmEB	0.01	4.89
1	7_16061617	7	16061617	mrMLM, FASTmrEMMA	-0.02	6.82
1	7_26881558	7	26881558	mrMLM	0.01	3.18
1	7_26202585	7	26202585	mrMLM, FASTmrEMMA, ISIS EM-BLASSO	-0.03	3.9
1	7_17850370	7	17850370	mrMLM, pLARmEB	-0.01	3.99
1	7_4465657	7	4465657	mrMLM	-0.01	1.38
1	7_14989214	7	14989214	FASTmrMLM, pLARmEB, ISIS EM-BLASSO	0.01	3.92
1	7_19804473	7	19804473	pLARmEB	-0.01	2.81
1	7_28762565	7	28762565	pLARmEB	0	1.58
1	8_3969714	8	3969714	mrMLM, FASTmrMLM, ISIS EM-BLASSO	-0.01	2.55
1	8_3229717	8	3229717	mrMLM	0.01	7.65
1	9_1888476	9	1888476	mrMLM	-0.01	2.32
1	9_3064875	9	3064875	mrMLM	-0.01	2.79
1	9_3547349	9	3547349	ISIS EM-BLASSO	-0.01	2.19
1	10_11883271	10	11883271	mrMLM, FASTmrMLM, ISIS EM-BLASSO	0.01	1.63
1	10_18097145	10	18097145	pLARmEB, ISIS EM-BLASSO	0.01	3.17
1	12_11690520	12	11690520	FASTmrMLM, pLARmEB, ISIS EM-BLASSO	0.01	6.28
2	1_28947777	1	28947777	mrMLM	0.01	6.3
2	1_14007262	1	14007262	mrMLM	-0.01	4.14
2	1_22247466	1	22247466	FASTmrMLM, pLARmEB	-0.01	3.3
2	1_40078588	1	40078588	FASTmrEMMA, ISIS EM-BLASSO	0.01	6.65
2	1_27418754	1	27418754	pLARmEB	0.01	4.74
2	1_27509526	1	27509526	ISIS EM-BLASSO	-0.01	4.21
2	2_5672621	2	5672621	mrMLM	0.01	5.44
2	2_21879667	2	21879667	pLARmEB	0.02	7.77
2	3_3499078	3	3499078	mrMLM, FASTmrMLM, pLARmEB, ISIS EM-BLASSO	0.01	1.46
2	3_24752985	3	24752985	mrMLM	0.01	3.33
2	3_19407013	3	19407013	FASTmrMLM, pLARmEB	0.01	3.8
2	3_27087884	3	27087884	FASTmrMLM, pLARmEB	0.01	5.54
2	3_35337198	3	35337198	FASTmrMLM, pLARmEB	-0.01	3.42
2	3_14056470	3	14056470	ISIS EM-BLASSO	0.01	2.62
2	4_33881117	4	33881117	mrMLM	-0.01	4.01
2	4_35296090	4	35296090	FASTmrMLM, pLARmEB	-0.01	0
2	4_35298058	4	35298058	ISIS EM-BLASSO	0.01	2.6
2	5_28003698	5	28003698	mrMLM, FASTmrMLM, pLARmEB	0.01	4.26
2	5_5855399	5	5855399	mrMLM	-0.01	4.29
2	5_1089666	5	1089666	FASTmrMLM	0	0.91
2	5_1039308	5	1039308	FASTmrEMMA	0.03	9.57
2	5_1025376	5	1025376	pLARmEB	-0.01	4.33
2	5_16726613	5	16726613	pLARmEB	0.01	1.43
2	5_663504	5	663504	ISIS EM-BLASSO	0	0.94
2	5_9718550	5	9718550	ISIS EM-BLASSO	-0.01	1.11
2	5_16389871	5	16389871	ISIS EM-BLASSO	-0.01	3.42
2	6_5892119	6	5892119	mrMLM	-0.01	5.85
2	6_16546125	6	16546125	mrMLM, FASTmrMLM	-0.01	2.18
2	6_407671	6	407671	FASTmrMLM, pLARmEB	0.01	2.63
2	6_22497833	6	22497833	FASTmrMLM, pLARmEB	0.01	1.5
2	6_2901690	6	2901690	pLARmEB	0.01	7.71
2	6_21663985	6	21663985	ISIS EM-BLASSO	0.01	2.02
2	6_22640459	6	22640459	ISIS EM-BLASSO	-0.01	2.25
2	7_16061617	7	16061617	mrMLM, FASTmrMLM, FASTmrEMMA, ISIS EM-BLASSO	-0.02	1.04
2	8_15180415	8	15180415	mrMLM	0.01	3.89
2	8_10578150	8	10578150	mrMLM, FASTmrMLM, pLARmEB	0	0
2	8_2803628	8	2803628	mrMLM	-0.01	0.92
2	8_10703609	8	10703609	mrMLM, ISIS EM-BLASSO	-0.02	2.36
2	8_1183752	8	1183752	FASTmrMLM	0.01	1.36
2	8_7617584	8	7617584	FASTmrMLM, pLARmEB	-0.02	3.48
2	8_26978022	8	26978022	FASTmrMLM, pLARmEB	0.01	2.7
2	8_3229717	8	3229717	ISIS EM-BLASSO	0.01	6.99
2	8_8286264	8	8286264	ISIS EM-BLASSO	0.01	2.26
2	9_9373567	9	9373567	mrMLM	-0.01	2.38
2	9_17240694	9	17240694	ISIS EM-BLASSO	-0.01	3.47
2	10_11883271	10	11883271	mrMLM	0.01	4.11
2	10_20641280	10	20641280	mrMLM, FASTmrMLM, pLARmEB, ISIS EM-BLASSO	-0.01	0.61
2	10_11122032	10	11122032	FASTmrMLM, pLARmEB, ISIS EM-BLASSO	0.01	1.12
2	10_11777661	10	11777661	FASTmrMLM	0.01	1.28
2	10_11120283	10	11120283	ISIS EM-BLASSO	0.01	1.97
2	10_18098237	10	18098237	ISIS EM-BLASSO	-0.01	5.53
2	11_15255833	11	15255833	FASTmrMLM, pLARmEB	-0.01	0.7
2	11_17412972	11	17412972	FASTmrMLM	-0.02	6.1
2	11_14948577	11	14948577	ISIS EM-BLASSO	-0.01	6.09
2	11_15255752	11	15255752	ISIS EM-BLASSO	-0.01	0.49
2	11_19762048	11	19762048	ISIS EM-BLASSO	-0.01	1.29
2	12_11690520	12	11690520	mrMLM, FASTmrMLM	0.01	1.87
2	12_11770456	12	11770456	ISIS EM-BLASSO	0.01	1.35
2	12_15918889	12	15918889	ISIS EM-BLASSO	-0.01	2.44
2	12_20085410	12	20085410	ISIS EM-BLASSO	-0.01	4.81

## Sheet: Table S7
Table S7. List of candidate genes identified associated with root diameter
Chr - Chromosome; Pos - Position
Experiment	Chr	gene_id	start	stop	strand	Function
1	1	LOC_Os01g29250	16394680	16397765	-	retrotransposon 20protein 2C 20putative 2C 20unclassified 2C 20expressed
1	1	LOC_Os01g46070	26190752	26194517	+	lactate 2Fmalate 20dehydrogenase 2C 20putative 2C 20expressed
1	2	LOC_Os02g19924	11716855	11736546	+	aminotransferase 2C 20classes 20I 20and 20II 2C 20domain 20containing 20protein 2C 20expressed
1	2	LOC_Os02g19840	11626569	11630847	-	retrotransposon 20protein 2C 20putative 2C 20Ty3-gypsy 20subclass 2C 20expressed
1	2	LOC_Os02g23860	13814923	13816295	-	retrotransposon 2C 20putative 2C 20centromere-specific 2C 20expressed
1	3	LOC_Os03g25220	14413586	14414908	-	OsFBX88 20- 20F-box 20domain 20containing 20protein 2C 20expressed
1	3	LOC_Os03g26280	15029694	15030959	+	expressed 20protein
1	3	LOC_Os03g36239	20096461	20109013	-	retrotransposon 20protein 2C 20putative 2C 20Ty3-gypsy 20subclass 2C 20expressed
1	3	LOC_Os03g38800	21544801	21546790	-	AAA 20family 20ATPase 2C 20putative 2C 20expressed
1	4	LOC_Os04g33280	20124599	20131224	-	expressed 20protein
1	5	LOC_Os05g02860	1034212	1040100	-	retrotransposon 20protein 2C 20putative 2C 20Ty3-gypsy 20subclass 2C 20expressed
1	5	LOC_Os05g48850	28003165	28005001	+	no 20apical 20meristem 20protein 2C 20putative 2C 20expressed
1	5	LOC_Os05g17040	9717470	9720406	-	retrotransposon 20protein 2C 20putative 2C 20unclassified 2C 20expressed
1	6	LOC_Os06g28310	16076345	16085869	+	retrotransposon 20protein 2C 20putative 2C 20unclassified 2C 20expressed
1	7	LOC_Os07g45050	26880241	26881891	+	expressed 20protein
1	7	LOC_Os07g43790	26199722	26204423	-	retrotransposon 20protein 2C 20putative 2C 20unclassified 2C 20expressed
1	7	LOC_Os07g33620	20084700	20086612	+	cytochrome 20P450 20domain 20containing 20protein 2C 20expressed
1	10	LOC_Os10g22869	11878644	11885484	-	expressed 20protein
1	11	LOC_Os11g40860	24441327	24445724	+	retrotransposon 20protein 2C 20putative 2C 20unclassified 2C 20expressed
1	12	LOC_Os12g20110	11690211	11695707	+	retrotransposon 20protein 2C 20putative 2C 20Ty3-gypsy 20subclass 2C 20expressed
2	1	LOC_Os01g29250	16394680	16397765	-	retrotransposon 20protein 2C 20putative 2C 20unclassified 2C 20expressed
2	1	LOC_Os01g68990	40077988	40082410	-	retrotransposon 2C 20putative 2C 20centromere-specific 2C 20expressed
2	1	LOC_Os01g47900	27417284	27420084	-	S-locus-like 20receptor 20protein 20kinase 2C 20putative 2C 20expressed
2	3	LOC_Os03g26280	15029694	15030959	+	expressed 20protein
2	3	LOC_Os03g44030	24752849	24753552	+	expressed 20protein
2	4	LOC_Os04g59380	35297598	35300349	+	ZOS4-14 20- 20C2H2 20zinc 20finger 20protein 2C 20expressed
2	5	LOC_Os05g34010	20086679	20091534	-	peptide 20transporter 20PTR2 2C 20putative 2C 20expressed
2	5	LOC_Os05g02860	1034212	1040100	-	retrotransposon 20protein 2C 20putative 2C 20Ty3-gypsy 20subclass 2C 20expressed
2	5	LOC_Os05g28550	16724754	16727090	+	retrotransposon 20protein 2C 20putative 2C 20Ty3-gypsy 20subclass 2C 20expressed
2	5	LOC_Os05g17040	9717470	9720406	-	retrotransposon 20protein 2C 20putative 2C 20unclassified 2C 20expressed
2	6	LOC_Os06g11220	5891071	5892183	-	retrotransposon 20protein 2C 20putative 2C 20unclassified
2	6	LOC_Os06g29030	16544764	16548531	+	retrotransposon 20protein 2C 20putative 2C 20Ty3-gypsy 20subclass 2C 20expressed
2	6	LOC_Os06g01680	403722	410270	+	expressed 20protein
2	6	LOC_Os06g38050	22496593	22499835	+	transposon 20protein 2C 20putative 2C 20CACTA 2C 20En 2FSpm 20sub-class 2C 20expressed
2	6	LOC_Os06g38270	22639448	22642108	-	retrotransposon 20protein 2C 20putative 2C 20Ty3-gypsy 20subclass 2C 20expressed
2	8	LOC_Os08g17480	10702878	10709350	+	retrotransposon 20protein 2C 20putative 2C 20Ty3-gypsy 20subclass 2C 20expressed
2	8	LOC_Os08g02820	1182731	1184044	-	plant 20protein 20of 20unknown 20function 20domain 20containing 20protein 2C 20expressed
2	8	LOC_Os08g12850	7616771	7620292	-	pentatricopeptide 2C 20putative 2C 20expressed
2	8	LOC_Os08g42670	26968542	26978241	-	resistance 20protein 2C 20putative 2C 20expressed
2	9	LOC_Os09g34060	20094122	20098653	-	transcription 20factor 20RF2a 2C 20putative 2C 20expressed
2	10	LOC_Os10g22869	11878644	11885484	-	expressed 20protein
2	10	LOC_Os10g37500	20081776	20083719	-	AAA-type 20ATPase 20family 20protein 2C 20putative 2C 20expressed
2	10	LOC_Os10g21690	11119889	11121663	-	EDA28 2FMEE23 2C 20putative 2C 20expressed
2	11	LOC_Os11g26620	15253376	15256955	+	expressed 20protein
2	11	LOC_Os11g29970	17411995	17417481	-	NB-ARC 20domain 20containing 20protein 2C 20expressed
2	11	LOC_Os11g26120	14943101	14949448	-	retrotransposon 20protein 2C 20putative 2C 20Ty3-gypsy 20subclass 2C 20expressed
2	11	LOC_Os11g26620	15253376	15256955	+	expressed 20protein
2	11	LOC_Os11g40860	24441327	24445724	+	retrotransposon 20protein 2C 20putative 2C 20unclassified 2C 20expressed
2	12	LOC_Os12g20110	11690211	11695707	+	retrotransposon 20protein 2C 20putative 2C 20Ty3-gypsy 20subclass 2C 20expressed
2	12	LOC_Os12g33210	20084212	20088112	+	OsFBL59 20- 20F-box 20domain 20and 20LRR 20containing 20protein 2C 20expressed

## Sheet: Table S8
Table S8. List of MTAs identified through GWAS from both experiments associated with tip root porosity
Chr - Chromosome; Pos - Position; QTN- Quantitative trait nucleotide; PVE - Phenotypic Variation Expected
Experiment	SNPid	Chr	Pos	Methods	QTN effect	PVE (%)
1	1_5945064	1	5945064	mrMLM, FASTmrMLM, pLARmEB, ISIS EM-BLASSO	0.91805	1.62815
1	1_28087012	1	28087012	mrMLM	-1.4135	2.1556
1	1_33786202	1	33786202	mrMLM, pLARmEB	1.8221	5.1984
1	1_15823684	1	15823684	mrMLM	-1.5758	3.7599
1	1_34109921	1	34109921	pLARmEB	-1.9815	1.7671
1	1_36078493	1	36078493	ISIS EM-BLASSO	-2.2202	4.0424
1	2_16789775	2	16789775	mrMLM	1.6835	3.7566
1	2_1977077	2	1977077	FASTmrMLM	1.3302	3.7354
1	2_35220430	2	35220430	FASTmrEMMA	-2.8519	4.7633
1	2_14499480	2	14499480	pLARmEB, ISIS EM-BLASSO	-2.1148	2.96195
1	2_24686356	2	24686356	pLARmEB	2.6907	10.6528
1	3_13408609	3	13408609	mrMLM, FASTmrMLM, pLARmEB, ISIS EM-BLASSO	-2.08005	9.10555
1	3_14886759	3	14886759	mrMLM	-1.3799	1.2298
1	3_25388588	3	25388588	FASTmrMLM	3.8036	6.1707
1	3_20106775	3	20106775	pLARmEB	-2.3965	2.8782
1	4_32146771	4	32146771	mrMLM	-1.2782	2.5035
1	4_3741980	4	3741980	mrMLM	3.1474	7.5815
1	4_5901972	4	5901972	FASTmrMLM, pLARmEB, ISIS EM-BLASSO	-1.857	3.60875
1	4_27166572	4	27166572	pLARmEB	-0.4088	0.2514
1	4_13351126	4	13351126	ISIS EM-BLASSO	1.1592	3.1121
1	6_15001592	6	15001592	FASTmrMLM	2.4187	5.0902
1	7_5347116	7	5347116	mrMLM, pLARmEB	-1.7661	1.7541
1	7_25201955	7	25201955	mrMLM, pLARmEB	-1.70665	2.61955
1	7_2146246	7	2146246	FASTmrMLM, pLARmEB	-2.00395	2.6974
1	7_9760932	7	9760932	FASTmrMLM	-2.48	3.5056
1	7_25049713	7	25049713	pLARmEB	-1.2273	0.2238
1	7_27887013	7	27887013	pLARmEB	0.6576	0.5762
1	7_27319650	7	27319650	ISIS EM-BLASSO	1.0377	2.2122
1	8_18572912	8	18572912	mrMLM	-1.7035	3.8462
1	8_26867817	8	26867817	mrMLM	1.4424	3.4022
1	8_6566366	8	6566366	mrMLM, FASTmrMLM, pLARmEB	-1.4752	3.3832
1	8_6366578	8	6366578	pLARmEB	1.7383	4.8127
1	8_7295412	8	7295412	pLARmEB, ISIS EM-BLASSO	1.54025	5.07005
1	8_15637031	8	15637031	pLARmEB	2.1251	2.817
1	9_2187693	9	2187693	FASTmrMLM	-1.2835	2.3467
1	9_15017646	9	15017646	FASTmrMLM, FASTmrEMMA, ISIS EM-BLASSO	2.4181	5.49755
1	9_16916492	9	16916492	FASTmrEMMA	-5.53	7.5283
1	10_5126500	10	5126500	mrMLM, pLARmEB	2.0273	5.1835
1	10_8800112	10	8800112	mrMLM	0.9846	1.397
1	10_5723905	10	5723905	mrMLM, pLARmEB	-2.40965	9.57555
1	10_16392424	10	16392424	mrMLM	1.9104	6.0637
1	10_2658357	10	2658357	FASTmrMLM	1.6016	4.4132
1	10_11948063	10	11948063	ISIS EM-BLASSO	1.0542	2.5238
1	10_12906186	10	12906186	ISIS EM-BLASSO	1.6815	5.146
1	11_18717506	11	18717506	FASTmrMLM	-2.3845	4.5836
1	11_20813585	11	20813585	pLARmEB	1.6196	4.2069
1	11_20549172	11	20549172	ISIS EM-BLASSO	1.9108	8.6796
1	12_27356339	12	27356339	mrMLM	1.4454	3.286
1	12_12779419	12	12779419	FASTmrMLM, pLARmEB, ISIS EM-BLASSO	-2.4031	7.178
1	12_25730360	12	25730360	FASTmrEMMA	3.4846	5.0507
2	1_33785113	1	33785113	mrMLM, pLARmEB, ISIS EM-BLASSO	-1.9927	4.88895
2	1_6316067	1	6316067	FASTmrMLM	1.2403	5.9452
2	1_5945064	1	5945064	pLARmEB	0.7384	1.4845
2	1_9872218	1	9872218	pLARmEB	0.767	1.0605
2	1_10211601	1	10211601	ISIS EM-BLASSO	-1.4098	6.7502
2	2_8376459	2	8376459	FASTmrMLM, ISIS EM-BLASSO	0.8331	2.43295
2	2_33636414	2	33636414	ISIS EM-BLASSO	-1.0558	2.4275
2	3_13408609	3	13408609	mrMLM, FASTmrMLM	-1.5555	7.83265
2	3_20106775	3	20106775	FASTmrMLM, pLARmEB, ISIS EM-BLASSO	-2.2533	4.9847
2	3_23495492	3	23495492	FASTmrMLM, pLARmEB, ISIS EM-BLASSO	1.99475	12.6027
2	3_25388588	3	25388588	FASTmrMLM	3.8023	11.0851
2	3_19299758	3	19299758	pLARmEB	-1.1866	3.8299
2	3_25388579	3	25388579	pLARmEB	3.4304	5.8021
2	3_25416351	3	25416351	pLARmEB, ISIS EM-BLASSO	1.05165	1.7487
2	4_5901972	4	5901972	FASTmrMLM, ISIS EM-BLASSO	-1.07325	2.14975
2	4_29340380	4	29340380	FASTmrMLM, pLARmEB, ISIS EM-BLASSO	0.9499	2.0601
2	4_32257284	4	32257284	FASTmrMLM, ISIS EM-BLASSO	-1.65565	5.52885
2	4_18014578	4	18014578	pLARmEB	0.8372	1.7208
2	4_5685229	4	5685229	ISIS EM-BLASSO	1.3632	6.2301
2	6_25533720	6	25533720	mrMLM	-2.5694	16.2447
2	6_13504504	6	13504504	mrMLM	-1.4008	5.258
2	6_15001529	6	15001529	FASTmrMLM	-0.8015	2.3575
2	6_15001592	6	15001592	FASTmrMLM, pLARmEB	2.1845	6.16705
2	7_5347116	7	5347116	FASTmrMLM	-0.8894	1.0057
2	7_9760932	7	9760932	FASTmrMLM	-1.4183	2.0612
2	7_24282574	7	24282574	FASTmrMLM	-1.1961	2.1561
2	8_6566366	8	6566366	mrMLM	-1.5276	5.8441
2	8_8287133	8	8287133	ISIS EM-BLASSO	1.2476	2.3043
2	8_20251053	8	20251053	ISIS EM-BLASSO	1.1589	4.1256
2	8_26867817	8	26867817	ISIS EM-BLASSO	0.8709	2.6436
2	9_12552235	9	12552235	mrMLM, FASTmrMLM, pLARmEB	1.35085	3.03485
2	9_2187693	9	2187693	FASTmrMLM, pLARmEB, ISIS EM-BLASSO	-1.0906	2.83345
2	9_13383967	9	13383967	pLARmEB	1.374	4.432
2	10_7105285	10	7105285	mrMLM	-1.6612	7.4169
2	10_5126500	10	5126500	mrMLM	1.2768	3.0497
2	10_2670989	10	2670989	FASTmrMLM	1.3916	3.2466
2	11_22427760	11	22427760	mrMLM	1.1196	1.4634
2	11_1031432	11	1031432	mrMLM, ISIS EM-BLASSO	1.25105	4.8284
2	11_16015676	11	16015676	mrMLM	1.7835	4.864
2	11_18717506	11	18717506	FASTmrMLM	-1.0415	1.5719
2	11_14310946	11	14310946	pLARmEB	1.3954	3.009
2	12_16167484	12	16167484	mrMLM	-2.1903	4.646
2	12_3581953	12	3581953	mrMLM	-1.2434	4.0976
2	12_13064078	12	13064078	FASTmrMLM, pLARmEB	0.9488	2.72265

## Sheet: Table S9
Table S9. List of candidate genes identified associated with tip root porosity
Chr - Chromosome; Pos - Position
Experiment	Chr	gene_id	start	stop	strand	Function
1	1	LOC_Os01g62340	36076072	36079276	-	retrotransposon 20protein 2C 20putative 2C 20Ty3-gypsy 20subclass 2C 20expressed
1	1	LOC_Os01g58444	33782471	33786281	+	expressed 20protein
1	2	LOC_Os02g28400	16783178	16792942	-	retrotransposon 20protein 2C 20putative 2C 20unclassified 2C 20expressed
1	2	LOC_Os02g57470	35218310	35221098	-	tetratricopeptide 20repeat 20containing 20protein 2C 20putative 2C 20expressed
1	3	LOC_Os03g23200	13405258	13413148	-	retrotransposon 20protein 2C 20putative 2C 20Ty3-gypsy 20subclass 2C 20expressed
1	3	LOC_Os03g44970	25388427	25388783	+	hypothetical 20protein
1	4	LOC_Os04g33200	20083916	20091821	-	heparan-alpha-glucosaminide 20N-acetyltransferase 2C 20putative 2C 20expressed
1	4	LOC_Os04g53950	32145679	32147540	+	glycosyl 20hydrolases 20family 2016 20protein 2C 20protein 2C 20expressed
1	4	LOC_Os04g23360	13345548	13352576	-	retrotransposon 20protein 2C 20putative 2C 20unclassified 2C 20expressed
1	4	LOC_Os04g10880	5899050	5902450	-	retrotransposon 20protein 2C 20putative 2C 20unclassified 2C 20expressed
1	4	LOC_Os04g07000	3741495	3743579	+	retrotransposon 20protein 2C 20putative 2C 20unclassified 2C 20expressed
1	7	LOC_Os07g10020	5346830	5348412	+	retrotransposon 20protein 2C 20putative 2C 20unclassified 2C 20expressed
1	6	LOC_Os06g25670	14995185	15004048	-	expressed 20protein
1	7	LOC_Os07g42104	25195551	25208995	+	expressed 20protein
1	7	LOC_Os07g04850	2144150	2151824	+	pre-mRNA-processing 20factor 2031 2C 20putative 2C 20expressed
1	7	LOC_Os07g02630	950862	953907	-	expressed 20protein
1	7	LOC_Os07g41820	25049116	25051575	+	stress 20responsive 20A 2FB 20Barrel 20domain 20containing 20protein 2C 20expressed
1	7	LOC_Os07g46660	27883552	27888242	+	ubiquitin 20carboxyl-terminal 20hydrolase 20domain 20containing 20protein 2C 20expressed
1	7	LOC_Os07g45760	27318037	27320868	+	expressed 20protein
1	8	LOC_Os08g10810	6365997	6368525	+	retrotransposon 2C 20putative 2C 20centromere-specific 2C 20expressed
1	8	LOC_Os08g12380	7294103	7295938	-	retrotransposon 20protein 2C 20putative 2C 20Ty3-gypsy 20subclass 2C 20expressed
1	8	LOC_Os08g11170	6564877	6566557	+	retrotransposon 20protein 2C 20putative 2C 20unclassified
1	9	LOC_Os09g27800	16913699	16918174	+	retrotransposon 20protein 2C 20putative 2C 20unclassified 2C 20expressed
1	10	LOC_Os10g09500	5125390	5134977	+	retrotransposon 20protein 2C 20putative 2C 20Ty3-gypsy 20subclass 2C 20expressed
1	10	LOC_Os10g31250	16388451	16393425	-	expressed 20protein
1	10	LOC_Os10g22960	11947165	11951353	+	hydrolase 20protein 2C 20putative 2C 20expressed
1	10	LOC_Os10g05390	2657347	2658407	+	hypothetical 20protein
1	12	LOC_Os12g22610	12771826	12779650	+	retrotransposon 20protein 2C 20putative 2C 20unclassified 2C 20expressed
1	12	LOC_Os12g41570	25729712	25730584	-	expressed 20protein
2	1	LOC_Os01g58444	33782471	33786281	+	expressed 20protein
2	1	LOC_Os01g18230	10211391	10212188	-	FAD-linked 20oxidoreductase 20protein 2C 20putative 2C 20expressed
2	3	LOC_Os03g23200	13405258	13413148	-	retrotransposon 20protein 2C 20putative 2C 20Ty3-gypsy 20subclass 2C 20expressed
2	3	LOC_Os03g36239	20096461	20109013	-	retrotransposon 20protein 2C 20putative 2C 20Ty3-gypsy 20subclass 2C 20expressed
2	3	LOC_Os03g42230	23491995	23496324	+	B3 20DNA 20binding 20domain 20containing 20protein 2C 20expressed
2	3	LOC_Os03g44970	25388427	25388783	+	hypothetical 20protein
2	3	LOC_Os03g33760	19298845	19304398	+	retrotransposon 20protein 2C 20putative 2C 20unclassified 2C 20expressed
2	3	LOC_Os03g44970	25388427	25388783	+	hypothetical 20protein
2	4	LOC_Os04g33200	20083916	20091821	-	heparan-alpha-glucosaminide 20N-acetyltransferase 2C 20putative 2C 20expressed
2	4	LOC_Os04g10880	5899050	5902450	-	retrotransposon 20protein 2C 20putative 2C 20unclassified 2C 20expressed
2	4	LOC_Os04g49210	29338950	29341166	-	naringenin 2C2-oxoglutarate 203-dioxygenase 2C 20putative 2C 20expressed
2	4	LOC_Os04g54140	32254120	32258262	-	receptor-like 20kinase 2C 20putative 2C 20expressed
2	4	LOC_Os04g30180	18012199	18015102	+	F-box 2FLRR-repeat 20protein 2014 2C 20putative 2C 20expressed
2	6	LOC_Os06g25670	14995185	15004048	-	expressed 20protein
2	6	LOC_Os06g25670	14995185	15004048	-	expressed 20protein
2	7	LOC_Os07g10020	5346830	5348412	+	retrotransposon 20protein 2C 20putative 2C 20unclassified 2C 20expressed
2	7	LOC_Os07g02630	950862	953907	-	expressed 20protein
2	8	LOC_Os08g11170	6564877	6566557	+	retrotransposon 20protein 2C 20putative 2C 20unclassified
2	8	LOC_Os08g32690	20248647	20254581	-	expressed 20protein
2	9	LOC_Os09g22100	13382298	13389337	+	retrotransposon 20protein 2C 20putative 2C 20unclassified 2C 20expressed
2	10	LOC_Os10g12740	7103112	7108165	-	retrotransposon 20protein 2C 20putative 2C 20unclassified 2C 20expressed
2	10	LOC_Os10g09500	5125390	5134977	+	retrotransposon 20protein 2C 20putative 2C 20Ty3-gypsy 20subclass 2C 20expressed
2	11	LOC_Os11g37860	22427759	22435407	+	stripe 20rust 20resistance 20protein 20Yr10 2C 20putative 2C 20expressed
2	11	LOC_Os11g02964	1030409	1038578	+	FAR1 20family 20protein 2C 20expressed
2	11	LOC_Os11g25120	14309794	14311394	-	transposon 20protein 2C 20putative 2C 20unclassified
2	12	LOC_Os12g07280	3580032	3582974	+	ZOS12-02 20- 20C2H2 20zinc 20finger 20protein 2C 20expressed
2	12	LOC_Os12g33230	20100274	20103255	+	OsFBL60 20- 20F-box 20domain 20and 20LRR 20containing 20protein 2C 20expressed

## Sheet: Table S10
Table S10. List of MTAs identified through GWAS from both experiments associated with tiller number
Chr - Chromosome; Pos - Position; QTN- Quantitative trait nucleotide; PVE - Phenotypic Variation Expected
Experiment	SNPid	Chr	Pos	Methods	QTN effect	PVE (%)
1	1_25909840	1	25909840	FASTmrEMMA	1.039	2.4193
1	1_6809068	1	6809068	pLARmEB	-0.2725	1.6954
1	1_42109230	1	42109230	pLARmEB	-0.3279	2.4168
1	1_41901187	1	41901187	ISIS EM-BLASSO	-0.3489	1.183
1	2_4234570	2	4234570	mrMLM, FASTmrMLM, FASTmrEMMA, pLARmEB, ISIS EM-BLASSO	-0.8765	9.4026
1	2_20018109	2	20018109	mrMLM	0.3476	2.6831
1	2_33057336	2	33057336	FASTmrMLM	0.557	6.2744
1	2_18901407	2	18901407	FASTmrEMMA	1.0062	4.0318
1	2_31314247	2	31314247	pLARmEB	0.4525	4.7423
1	2_19392763	2	19392763	ISIS EM-BLASSO	-0.3145	2.3642
1	3_6785155	3	6785155	FASTmrMLM, pLARmEB	-0.3491	2.2013
1	3_13474903	3	13474903	pLARmEB	0.3824	3.5517
1	3_35414319	3	35414319	ISIS EM-BLASSO	-0.4654	4.1168
1	4_6041321	4	6041321	pLARmEB	-0.292	2.0017
1	4_13095231	4	13095231	pLARmEB, ISIS EM-BLASSO	-0.28885	1.59255
1	5_6559775	5	6559775	mrMLM	0.5899	7.1047
1	5_6587355	5	6587355	FASTmrMLM	-0.1986	0.9331
1	5_25976223	5	25976223	FASTmrMLM, pLARmEB, ISIS EM-BLASSO	-0.5284	7.7522
1	5_4430755	5	4430755	pLARmEB	0.3362	1.9026
1	6_23391063	6	23391063	FASTmrMLM, pLARmEB, ISIS EM-BLASSO	-0.582	7.735
1	6_29826736	6	29826736	FASTmrMLM	-0.4254	4.2152
1	7_2839638	7	2839638	mrMLM	-0.8546	5.2746
1	7_18791718	7	18791718	mrMLM, FASTmrMLM	-0.9313	7.6812
1	7_27135985	7	27135985	mrMLM, FASTmrMLM, FASTmrEMMA, pLARmEB, ISIS EM-BLASSO	-0.73415	4.1417
1	7_19064086	7	19064086	mrMLM, FASTmrMLM, ISIS EM-BLASSO	0.42705	2.66045
1	7_27420947	7	27420947	FASTmrMLM, pLARmEB	0.6133	4.05605
1	7_6309365	7	6309365	ISIS EM-BLASSO	0.6481	8.3192
1	7_7631132	7	7631132	ISIS EM-BLASSO	-0.4166	2.8068
1	7_8538935	7	8538935	ISIS EM-BLASSO	-0.3929	1.9144
1	8_8290312	8	8290312	mrMLM	-0.6105	9.0509
1	8_13778071	8	13778071	mrMLM, FASTmrMLM, ISIS EM-BLASSO	-0.58925	2.7094
1	8_11839610	8	11839610	FASTmrEMMA, pLARmEB	0.8441	4.02085
1	8_10711103	8	10711103	pLARmEB	0.4841	1.8965
1	9_22292851	9	22292851	mrMLM	0.5709	4.3966
1	9_9067245	9	9067245	FASTmrMLM, pLARmEB	-0.42915	4.3052
1	9_16248916	9	16248916	FASTmrMLM	-0.2974	2.0765
1	10_5127244	10	5127244	FASTmrMLM	-0.3921	1.7262
1	10_20013616	10	20013616	FASTmrMLM, FASTmrEMMA, pLARmEB, ISIS EM-BLASSO	-0.71315	3.2709
1	10_2723999	10	2723999	ISIS EM-BLASSO	0.4994	4.3471
1	11_25456142	11	25456142	mrMLM	0.6565	8.6371
1	11_14312492	11	14312492	FASTmrMLM	-0.4374	4.8637
1	11_15718735	11	15718735	pLARmEB, ISIS EM-BLASSO	0.6057	3.74115
1	11_25228293	11	25228293	ISIS EM-BLASSO	0.3886	3.5876
1	12_22283187	12	22283187	ISIS EM-BLASSO	-0.4272	3.8995
2	1_33778693	1	33778693	mrMLM, FASTmrMLM	-0.3539	3.30365
2	1_16394879	1	16394879	FASTmrMLM, pLARmEB	-0.47365	4.75265
2	1_17600015	1	17600015	FASTmrMLM, pLARmEB	0.2764	2.2751
2	1_37885982	1	37885982	FASTmrMLM, pLARmEB	-0.451	3.23025
2	1_37909971	1	37909971	FASTmrMLM	0.3142	3.7086
2	2_30966338	2	30966338	mrMLM	0.4172	5.5132
2	2_7858966	2	7858966	mrMLM, FASTmrMLM	-0.4504	4.66185
2	2_33150764	2	33150764	mrMLM, FASTmrMLM, pLARmEB, ISIS EM-BLASSO	0.2698	1.442
2	3_33349390	3	33349390	mrMLM, FASTmrMLM, FASTmrEMMA	-0.7572	3.80375
2	3_10856504	3	10856504	mrMLM	0.401	1.8561
2	3_13565552	3	13565552	mrMLM, FASTmrMLM	-0.4031	3.86295
2	3_17714966	3	17714966	FASTmrMLM	-0.3603	4.2005
2	3_11944032	3	11944032	FASTmrEMMA	-0.8562	4.1024
2	3_13408759	3	13408759	ISIS EM-BLASSO	0.4863	4.874
2	3_25885259	3	25885259	ISIS EM-BLASSO	0.2985	3.1484
2	4_757459	4	757459	mrMLM	0.312	3.129
2	4_17345075	4	17345075	pLARmEB, ISIS EM-BLASSO	0.40455	3.9532
2	4_16866374	4	16866374	ISIS EM-BLASSO	-0.4449	8.1368
2	5_19564231	5	19564231	mrMLM, ISIS EM-BLASSO	-0.7461	6.60565
2	5_17411612	5	17411612	mrMLM	-0.2978	2.434
2	5_27119558	5	27119558	FASTmrMLM	-0.4624	4.1057
2	5_28575739	5	28575739	pLARmEB	-0.2137	1.4467
2	5_29806428	5	29806428	pLARmEB	-0.328	3.4227
2	6_14108111	6	14108111	mrMLM, FASTmrMLM, pLARmEB	0.46575	3.90245
2	6_15774248	6	15774248	mrMLM	0.5573	2.6411
2	6_22641064	6	22641064	pLARmEB	0.313	1.9535
2	7_951762	7	951762	mrMLM	-0.2651	2.259
2	7_6457456	7	6457456	FASTmrEMMA	1.0908	3.901
2	7_18921131	7	18921131	FASTmrEMMA	0.7643	5.2834
2	7_13081979	7	13081979	pLARmEB, ISIS EM-BLASSO	0.36355	4.08745
2	8_10711060	8	10711060	mrMLM, FASTmrMLM, pLARmEB	-0.3344	4.02155
2	9_1074892	9	1074892	mrMLM, FASTmrMLM, pLARmEB, ISIS EM-BLASSO	-0.3482	4.58465
2	9_11298008	9	11298008	mrMLM, FASTmrMLM, pLARmEB	-0.38875	4.7525
2	9_9113603	9	9113603	mrMLM, FASTmrMLM	-0.54815	9.41825
2	9_2526759	9	2526759	FASTmrMLM, pLARmEB, ISIS EM-BLASSO	-0.42345	4.0892
2	9_8080190	9	8080190	FASTmrMLM	-0.2729	2.9278
2	9_8104204	9	8104204	FASTmrMLM	0.1799	0.6723
2	9_4465924	9	4465924	pLARmEB	0.3124	2.4772
2	10_21440045	10	21440045	mrMLM, ISIS EM-BLASSO	-0.2971	2.54355
2	10_4755817	10	4755817	ISIS EM-BLASSO	0.3339	3.654
2	11_26099437	11	26099437	mrMLM, FASTmrMLM, FASTmrEMMA, ISIS EM-BLASSO	0.93945	3.2037
2	11_21275379	11	21275379	mrMLM, ISIS EM-BLASSO	-0.42155	3.87615
2	11_8926273	11	8926273	pLARmEB	-0.279	2.1137
2	12_11753359	12	11753359	mrMLM, FASTmrMLM	-0.42785	3.75105
2	12_25722643	12	25722643	FASTmrEMMA, pLARmEB	0.55515	1.6579
2	12_4979965	12	4979965	pLARmEB, ISIS EM-BLASSO	0.35725	3.6631
2	12_18264846	12	18264846	pLARmEB	0.4641	2.7646
2	12_18510477	12	18510477	pLARmEB	0.4165	0.7086

[truncated: 29 more sheets: Table S11, Table S12, Table S13, Table S14, Table S15, Table S16, Table S17, Table S18, Table S19, Table S20, Table S21, Table S22, Table S23, Table S24 , Table S25, Table S26, Table S27, Table S28, Table S29, Table S30 …]
